# Supplementary material for: Clinical Strains of Mycobacterium tuberculosis Representing Different Genotype Families Exhibit Distinct Propensities to Adopt the Differentially Culturable State
Source: MDPI journal article supplement (doi:10.3390/pathogens13040318), 2024-04-12
Supplement: s1 [file s1]

**Table S1:** Spoligotyping information used to classify the samples into the various *M. tuberculosis* genotype families and lineages.

[illegible]

[illegible]

[illegible]

[illegible]

\*Inna Vitol, Jeffrey Driscoll, Barry Kreiswirth, Natalia Kurepina, Kristin P. Bennett, "Identifying *Mycobacterium tuberculosis* Complex Strain Families using Spoligotypes", Infection, Genetics and Evolution, Volume 6, Issue 6, November 2006, Pages 491-504." in publications that benefit from this tool. [https://tbinsight.cs.rpi.edu/run\\_tb\\_lineage.html](https://tbinsight.cs.rpi.edu/run_tb_lineage.html)
